# Supplementary material for: MRecover: A Conditional Generative Model for Recovering Motion- Corrupted MR images Using AI Generated Contrast
Source: Research Square preprint supplement (doi:10.21203/rs.3.rs-9794116/v1), 2026-06-18
Supplement: Supplementary file 1 [file 0baaca0dbb6004f11b91fdcd.docx]

**Supplementary Materials**

Supplementary Material for: “MRecover: A Conditional Generative Model for Recovering Motion-Corrupted MR images Using AI Generated Contrast”

Supplementary Table 1. Comparison of hippocampal subfield volumes derived from as-acquired and AI-synthesized T2w-TSE images in the internal 7T validation dataset. For each region, the table reports the sample size (after segmentation quality check), mean volume for as-acquired and synthesized images, subject level percent difference (Δ%), and Pearson correlation coefficient (r).

| Hemisphere | Region | N | As acquired  TSE mean | AI Synthesized  TSE mean | Δ% | r |
| --- | --- | --- | --- | --- | --- | --- |
| left | CA1 | 117 | 713.12 | 693.09 | -2.76 | 0.960 |
| left | CA2+CA3 | 117 | 174.88 | 184.97 | 6.07 | 0.875 |
| left | DG | 117 | 501.58 | 523.67 | 4.61 | 0.931 |
| left | Sub | 117 | 1025.74 | 1051.04 | 2.55 | 0.948 |
| left | ErC | 117 | 907.71 | 927.40 | 2.39 | 0.897 |
| left | Tail | 117 | 566.46 | 550.06 | -2.71 | 0.936 |
| right | CA1 | 119 | 763.56 | 735.32 | -3.71 | 0.965 |
| right | CA2+CA3 | 119 | 200.04 | 206.08 | 3.52 | 0.905 |
| right | DG | 119 | 533.27 | 556.37 | 4.40 | 0.952 |
| right | Sub | 119 | 1043.38 | 1063.45 | 1.96 | 0.975 |
| right | ErC | 119 | 883.24 | 893.97 | 1.40 | 0.901 |
| right | Tail | 119 | 479.55 | 466.55 | -2.58 | 0.951 |

Supplementary Table 2. Comparison of hippocampal subfield volumes derived from as-acquired and AI-synthesized T2w-TSE images in the public 3T dataset. For each region, the table reports the sample size (after quality check), mean volume for as-acquired and synthesized images, subject level percent difference (Δ%), and Pearson correlation coefficient (r).

| Hemisphere | Region | N | As acquired  TSE mean | AI Synthesized  TSE mean | Δ% | r |
| --- | --- | --- | --- | --- | --- | --- |
| left | CA1 | 384 | 797.02 | 773.99 | -2.84% | 0.949 |
| left | CA2+CA3 | 384 | 186.44 | 209.65 | 13.16% | 0.873 |
| left | DG | 384 | 566.45 | 581.47 | 2.87% | 0.909 |
| left | Sub | 384 | 1127.21 | 1164.75 | 3.52% | 0.939 |
| left | ErC | 384 | 1099.03 | 1108.13 | 0.97% | 0.915 |
| left | Tail | 384 | 579.92 | 571.95 | -1.25% | 0.967 |
| right | CA1 | 367 | 833.67 | 830.26 | -0.34% | 0.962 |
| right | CA2+CA3 | 367 | 214.58 | 227.48 | 6.52% | 0.895 |
| right | DG | 367 | 592.52 | 615.28 | 4.08% | 0.896 |
| right | Sub | 367 | 1147.67 | 1179.52 | 3.00% | 0.923 |
| right | ErC | 367 | 1089.67 | 1108.17 | 1.89% | 0.891 |
| right | Tail | 367 | 494.67 | 496.60 | 0.67% | 0.972 |

Supplementary Figure 1. Representative example of image quality control. Only images meeting high-quality standards were assigned a passing grade, while those with moderate or severe motion artifacts were excluded from hippocampal subfield analysis.

Supplementary Figure 2. Examples of excluded hippocampal subfield segmentations. Only high-quality segmentation outputs were included in the final analysis. The two examples illustrate typical segmentation failures: (i) missed segmentation at the CA1/CA2 boundary and (ii) erroneous leakage of CA1 into the neighboring cerebrospinal fluid.
